# Supplementary material
Source: publisher figshare collection journal article supplement (https://acs.figshare.com/ndownloader/files/8702749)
Supplement: Supplementary file 1 [file 8702749]

#==============================================================================
data_global
#==============================================================================

_publ_contact_author               'David M. Hodgson'
_publ_contact_author_email          david.hodgson@chem.ox.ac.uk
_publ_contact_author_phone         '+44 1865 275697'
_contact_author_fax                '+44 1865 285002'

loop_
_publ_author_name
_publ_author_address
 'Fegheh-Hassanpour, Younes' 
;    
Chemistry Research Laboratory,
Department of Chemistry,
University of Oxford,
Mansfield Road, 
Oxford OX1 3TA. UK.
;
 'Arif, Tanzeel' 
;    
Chemistry Research Laboratory,
Department of Chemistry,
University of Oxford,
Mansfield Road, 
Oxford OX1 3TA. UK.
;
 'Sintim, Herman O.' 
;    
Chemistry Research Laboratory,
Department of Chemistry,
University of Oxford,
Mansfield Road, 
Oxford OX1 3TA. UK.
;
 'Al Mamari, Hamad H.' 
;    
Chemistry Research Laboratory,
Department of Chemistry,
University of Oxford,
Mansfield Road, 
Oxford OX1 3TA. UK.
;
  'Hodgson, David M.' 
;    
Chemistry Research Laboratory,
Department of Chemistry,
University of Oxford,
Mansfield Road, 
Oxford OX1 3TA. UK.
;

_publ_requested_journal                 
 'Journal of the American Chemical Society'
_journal_volume                    '?'
_journal_page_first                '?'
_journal_page_last                 '?'
_journal_year                      '2017'
_ccdc_journal_depnumber            '?'

_publ_section_title
;
Synthesis of 6,7-dideoxysqualestatin H5 by carbonyl ylide cycloaddition�rearrangement and cross-electrophile coupling
;

_publ_section_abstract
;  
An asymmetric synthesis of (-)-6,7-dideoxysqualestatin H5 is reported. Key features of the synthesis include (1) highly diastereoselective n-alkylation of a tartrate acetonide enolate and subsequent oxidation-hydrolysis to provide an asymmetric entry to the b-hydroxy-a-ketoester motif, (2) facilitation of Rh(II)-catalyzed cyclic carbonyl ylide formation-cycloaddition by cogeneration of keto and diazo functionality through ozonolysis of an unsaturated hydrazone, and (3) stereoretentive Ni-catalyzed sp3-sp2 cross-electrophile coupling between tricarboxylate core and side-chain to complete the natural product.
;
#==============================================================================
data_22
#==============================================================================
_audit_creation_date        "2017-04-12"
_audit_creation_method CRYSTALS_ver_14.61

_oxford_structure_analysis_title  '056JDJ17'
_chemical_name_systematic         .
_chemical_melting_point           .

_cell_length_a                    9.57910(10)
_cell_length_b                    8.51190(10)
_cell_length_c                    15.0831(2)
_cell_angle_alpha                 90
_cell_angle_beta                  100.9121(15)
_cell_angle_gamma                 90
_cell_volume                      1207.584(16)
 
_symmetry_cell_setting            'monoclinic' 
_symmetry_space_group_name_H-M    'P 21 ' 
_symmetry_space_group_name_Hall   'P 2yb' 
loop_
 _symmetry_equiv_pos_as_xyz
 'x,y,z'
 '-x,y+1/2,-z'

loop_
_atom_type_symbol
_atom_type_scat_dispersion_real
_atom_type_scat_dispersion_imag
_atom_type_scat_Cromer_Mann_a1
_atom_type_scat_Cromer_Mann_b1
_atom_type_scat_Cromer_Mann_a2
_atom_type_scat_Cromer_Mann_b2
_atom_type_scat_Cromer_Mann_a3
_atom_type_scat_Cromer_Mann_b3
_atom_type_scat_Cromer_Mann_a4
_atom_type_scat_Cromer_Mann_b4
_atom_type_scat_Cromer_Mann_c
_atom_type_scat_source  
 C       0.0181   0.0091   2.3100  20.8439   1.0200  10.2075   1.5886   0.5687
   0.8650  51.6512   0.2156 'International Tables Vol C 4.2.6.8 and 6.1.1.4'
 H       0.0000   0.0000   0.4930  10.5109   0.3229  26.1257   0.1402   3.1424
   0.0408  57.7998   0.0030 'International Tables Vol C 4.2.6.8 and 6.1.1.4'
 I      -0.3257   6.8362  20.1472   4.3470  18.9949   0.3814   7.5138  27.7660
   2.2735  66.8776   4.0712 'International Tables Vol C 4.2.6.8 and 6.1.1.4'
 O       0.0492   0.0322   3.0485  13.2771   2.2868   5.7011   1.5463   0.3239
   0.8670  32.9089   0.2508 'International Tables Vol C 4.2.6.8 and 6.1.1.4'
 Si      0.2541   0.3302   6.2915   2.4386   3.0353  32.3337   1.9891   0.6785
   1.5410  81.6937   1.1407 'International Tables Vol C 4.2.6.8 and 6.1.1.4'
 
 
_cell_formula_units_Z                    2

# Given Formula = C17 H27 I1 O9 Si1 
# Dc =      1.46 Fooo =    496.00 Mu =    112.54 M =    530.39
# Found Formula = C20 H34 O10 Si1 
# Dc =      1.27 FOOO =    496.00 Mu =     12.97 M =    462.57

_chemical_formula_sum             'C20 H34 O10 Si1'
_chemical_formula_moiety          'C20 H34 O10 Si1'
_chemical_compound_source                ?
_chemical_formula_weight            462.57
 
 
_cell_measurement_reflns_used        16487
_cell_measurement_theta_min              5
_cell_measurement_theta_max             76
_cell_measurement_temperature          150
 
_exptl_crystal_description        'block' 
_exptl_crystal_colour             'clear_pale_colourless' 
_exptl_crystal_size_min           0.240 
_exptl_crystal_size_mid           0.320 
_exptl_crystal_size_max           0.500 
 
_exptl_crystal_density_diffrn     1.272 
_exptl_crystal_density_meas       . 
_exptl_crystal_density_method     'not measured' 
# Non-dispersive F(000): 
_exptl_crystal_F_000              496 
_exptl_absorpt_coefficient_mu     1.297 
 
# Sheldrick geometric approximatio 0.66 0.73 
_exptl_absorpt_correction_type    multi-scan 
_exptl_absorpt_process_details    'CrysAlisPro, (Agilent, 2011)' 
_exptl_absorpt_correction_T_min   0.55 
_exptl_absorpt_correction_T_max   0.73 
_diffrn_measurement_device_type   'Oxford Diffraction SuperNova' 
_diffrn_measurement_device        'Area' 
_diffrn_radiation_monochromator   'graphite' 
_diffrn_radiation_type            'Cu K\a'
_diffrn_radiation_wavelength           1.54184
_diffrn_measurement_method        \w 
 
# If a reference occurs more than once, delete the author 
# and date from subsequent references. 
_computing_data_collection        'SuperNova, (Oxford Diffraction, 2010)' 
_computing_cell_refinement        'CrysAlisPro, (Agilent, 2011)' 
_computing_data_reduction         'CrysAlisPro, (Agilent, 2011)' 
_computing_structure_solution     'Superflip (Palatinus & Chapuis, 2007)' 
_computing_structure_refinement   'CRYSTALS (Betteridge et al., 2003)' 
_computing_publication_material   'CRYSTALS (Betteridge et al., 2003)' 
_computing_molecular_graphics     'CAMERON (Watkin et al., 1996)' 
 
_diffrn_standards_interval_time   . 
_diffrn_standards_interval_count  . 
_diffrn_standards_number          0 
_diffrn_standards_decay_%         . 
 
_diffrn_ambient_temperature        150
_diffrn_reflns_number             24093 
_reflns_number_total              4839 
_diffrn_reflns_av_R_equivalents   0.019 
# Number of reflections without Friedels Law is 4839 
# Number of reflections with Friedels Law is 2688 
# Theoretical number of reflections is about 2529 
 
 
_diffrn_reflns_theta_min          4.701 
_diffrn_reflns_theta_max          76.226 
_diffrn_measured_fraction_theta_max 0.994 
 
_diffrn_reflns_theta_full         74.702 
_diffrn_measured_fraction_theta_full 0.997 
 
 
_diffrn_reflns_limit_h_min        -11 
_diffrn_reflns_limit_h_max        12 
_diffrn_reflns_limit_k_min        -10 
_diffrn_reflns_limit_k_max        9 
_diffrn_reflns_limit_l_min        -18 
_diffrn_reflns_limit_l_max        18 
_reflns_limit_h_min               -12 
_reflns_limit_h_max               11 
_reflns_limit_k_min               -10 
_reflns_limit_k_max               9 
_reflns_limit_l_min               0 
_reflns_limit_l_max               18 
 
_oxford_diffrn_Wilson_B_factor    2.95 
_oxford_diffrn_Wilson_scale       0.05 
 
_atom_sites_solution_primary      Other  #heavy,direct,difmap,geom,iterative
# _atom_sites_solution_secondary  difmap
_atom_sites_solution_hydrogens    difmap
 
_refine_diff_density_min          -0.19 
_refine_diff_density_max          0.17 
 
 
# The current dictionary definitions do not cover the 
# situation where the reflections used for refinement were 
# selected by a user-defined sigma threshold 
 
 
# The values actually used during refinement 
_oxford_reflns_threshold_expression_ref     I>-10.0\s(I)
_refine_ls_number_reflns          4839 
_refine_ls_number_restraints      2 
_refine_ls_number_parameters      284 
_oxford_refine_ls_R_factor_ref    0.0249 
_refine_ls_wR_factor_ref          0.0661 
_refine_ls_goodness_of_fit_ref    1.0040 
_refine_ls_shift/su_max           0.0004265 
_refine_ls_shift/su_mean          0.0000261 
 
 
# The values computed with all filters except I/sigma 
_oxford_reflns_number_all         4839 
_refine_ls_R_factor_all           0.0249 
_refine_ls_wR_factor_all          0.0661 
 
# The values computed with a 2 sigma cutoff - a la SHELX 
_reflns_threshold_expression      I>2.0\s(I)
_reflns_number_gt                 4823 
_refine_ls_R_factor_gt            0.0248 
_refine_ls_wR_factor_gt           0.0660 
 
_refine_ls_abs_structure_Flack    0.015(17) 
_refine_ls_abs_structure_details  'Flack (1983), 2151 Friedel-pairs' 
# choose from: rm (reference molecule of known chirality), 
# ad (anomolous dispersion - Flack), rmad (rm and ad), 
# syn (from synthesis), unk (unknown) or . (not applicable). 
_chemical_absolute_configuration  'ad' 
 
 
_refine_ls_structure_factor_coef  Fsqd 
_refine_ls_matrix_type            full
_refine_ls_hydrogen_treatment     mixed          #undef, noref, refall,
                                                 # refxyz, refU, constr or mixed
_refine_ls_weighting_scheme       calc 
_refine_ls_weighting_details 
;
 Method= Modified Sheldrick 
 w=1/[\s^2^(F^2^) + ( 0.04P)^2^ + 0.25P] 
 ,where P=(max(Fo^2^,0) + 2Fc^2^)/3 
;
# Insert your own references if required - in alphabetical order 
_publ_section_references 
; 
Betteridge, P.W., Carruthers, J.R., Cooper, R.I., 
Prout, K. & Watkin, D.J. (2003). J. Appl. Cryst. 36, 1487. 
 
Flack, H. D. (1983). Acta Cryst. A39, 876-881. 
 
Agilent (2011). CrysAlisPro. 
 
Oxford Diffraction, (2010). Supernova User Manual. 
 
Palatinus, L. & Chapuis, G. (2007). J. Appl. Cryst. 40, 786-790. 
 
Watkin, D.J., Prout, C.K. & Pearce, L.J. (1996). CAMERON, Chemical 
Crystallography Laboratory, Oxford, UK. 
; 

# Uequiv = arithmetic mean of Ui i.e. Ueqiv = (U1+U2+U3)/3

# Replace last . with number of unfound hydrogen atoms attached to an atom.

# ..._refinement_flags_... 
# . no refinement constraints           S special position constraint on site
# G rigid group refinement of site      R riding atom
# D distance or angle restraint on site T thermal displacement constraints
# U Uiso or Uij restraint (rigid bond)  P partial occupancy constraint


loop_
_atom_site_label
_atom_site_type_symbol
_atom_site_fract_x
_atom_site_fract_y
_atom_site_fract_z
_atom_site_U_iso_or_equiv
_atom_site_occupancy
_atom_site_adp_type
_atom_site_refinement_flags_posn
_atom_site_refinement_flags_adp
_atom_site_refinement_flags_occupancy
_atom_site_disorder_assembly
_atom_site_disorder_group
_atom_site_attached_hydrogens
Si1 Si 0.31645(3) 0.25016(7) 0.12547(2) 0.0262 1.0000 Uani . . . . . . 
O2 O 0.21516(10) 0.31311(12) 0.19454(6) 0.0267 1.0000 Uani . . . . . . 
C3 C 0.16491(12) 0.27634(15) 0.27319(8) 0.0220 1.0000 Uani . . . . . . 
C4 C 0.25027(13) 0.14205(16) 0.32465(8) 0.0239 1.0000 Uani . . . . . . 
O5 O 0.21668(10) 0.12108(12) 0.40560(6) 0.0301 1.0000 Uani . . . . . . 
C6 C 0.27204(18) -0.01845(19) 0.45432(11) 0.0379 1.0000 Uani . . . . . . 
O7 O 0.32862(10) 0.05899(14) 0.29232(7) 0.0330 1.0000 Uani . . . . . . 
C8 C 0.00844(13) 0.22252(16) 0.24884(9) 0.0273 1.0000 Uani . . . . . . 
C9 C -0.08850(13) 0.35790(18) 0.20930(9) 0.0296 1.0000 Uani . . . . . . 
C10 C -0.05184(12) 0.50573(17) 0.26521(9) 0.0262 1.0000 Uani . . . . . . 
O11 O -0.05524(9) 0.47250(12) 0.35865(6) 0.0263 1.0000 Uani . . . . . . 
C12 C 0.08534(12) 0.43509(16) 0.40342(8) 0.0219 1.0000 Uani . . . . . . 
C13 C 0.17131(12) 0.43592(15) 0.32528(8) 0.0199 1.0000 Uani . . . . . . 
O14 O 0.09198(8) 0.54790(12) 0.26603(6) 0.0233 1.0000 Uani . . . . . . 
C15 C 0.32664(12) 0.48742(16) 0.34999(8) 0.0214 1.0000 Uani . . . . . . 
O16 O 0.34199(9) 0.63984(12) 0.33728(7) 0.0285 1.0000 Uani . . . . . . 
C17 C 0.48673(15) 0.69852(19) 0.35638(13) 0.0413 1.0000 Uani . . . . . . 
O18 O 0.42109(9) 0.39645(12) 0.37618(7) 0.0289 1.0000 Uani . . . . . . 
C19 C 0.13327(13) 0.55508(17) 0.47770(8) 0.0251 1.0000 Uani . . . . . . 
O20 O 0.26685(10) 0.53177(13) 0.51690(6) 0.0299 1.0000 Uani . . . . . . 
C21 C 0.31850(15) 0.62204(19) 0.59760(9) 0.0334 1.0000 Uani . . . . . . 
O22 O 0.05748(11) 0.65470(15) 0.49905(8) 0.0424 1.0000 Uani . . . . . . 
C23 C -0.14701(15) 0.6436(2) 0.23155(10) 0.0354 1.0000 Uani . . . . . . 
C24 C -0.11424(18) 0.7942(2) 0.28395(14) 0.0468 1.0000 Uani . . . . . . 
O25 O -0.16425(16) 0.79455(18) 0.36703(10) 0.0633 1.0000 Uani D . . . . . 
C26 C 0.25433(19) 0.0594(2) 0.07308(13) 0.0498 1.0000 Uani . . . . . . 
C27 C 0.50842(14) 0.2420(3) 0.17797(10) 0.0473 1.0000 Uani . . . . . . 
C28 C 0.2898(2) 0.4126(3) 0.03833(11) 0.0485 1.0000 Uani . . . . . . 
C29 C 0.1324(2) 0.4264(4) -0.00416(15) 0.0907 1.0000 Uani . . . . . . 
C30 C 0.3428(4) 0.5687(3) 0.08403(19) 0.0929 1.0000 Uani . . . . . . 
C31 C 0.3728(2) 0.3784(3) -0.03687(12) 0.0588 1.0000 Uani . . . . . . 
H61 H 0.2329 -0.0245 0.5085 0.0566 1.0000 Uiso R . . . . . 
H62 H 0.3745 -0.0144 0.4681 0.0559 1.0000 Uiso R . . . . . 
H63 H 0.2416 -0.1075 0.4149 0.0568 1.0000 Uiso R . . . . . 
H81 H -0.0183 0.1831 0.3019 0.0318 1.0000 Uiso R . . . . . 
H82 H 0.0022 0.1400 0.2048 0.0330 1.0000 Uiso R . . . . . 
H91 H -0.1870 0.3282 0.2096 0.0359 1.0000 Uiso R . . . . . 
H92 H -0.0792 0.3772 0.1478 0.0350 1.0000 Uiso R . . . . . 
H121 H 0.0903 0.3309 0.4319 0.0240 1.0000 Uiso R . . . . . 
H171 H 0.4844 0.8016 0.3310 0.0605 1.0000 Uiso R . . . . . 
H172 H 0.5197 0.7012 0.4208 0.0596 1.0000 Uiso R . . . . . 
H173 H 0.5486 0.6320 0.3295 0.0629 1.0000 Uiso R . . . . . 
H211 H 0.4182 0.6047 0.6160 0.0517 1.0000 Uiso R . . . . . 
H212 H 0.2728 0.5845 0.6448 0.0509 1.0000 Uiso R . . . . . 
H213 H 0.3017 0.7287 0.5893 0.0533 1.0000 Uiso R . . . . . 
H231 H -0.2467 0.6160 0.2320 0.0412 1.0000 Uiso R . . . . . 
H232 H -0.1361 0.6629 0.1698 0.0438 1.0000 Uiso R . . . . . 
H241 H -0.1715 0.8766 0.2467 0.0562 1.0000 Uiso R . . . . . 
H242 H -0.0127 0.8216 0.2900 0.0564 1.0000 Uiso R . . . . . 
H262 H 0.3044 0.0357 0.0253 0.0735 1.0000 Uiso R . . . . . 
H263 H 0.2622 -0.0265 0.1140 0.0750 1.0000 Uiso R . . . . . 
H261 H 0.1566 0.0649 0.0491 0.0765 1.0000 Uiso R . . . . . 
H273 H 0.5682 0.2547 0.1330 0.0701 1.0000 Uiso R . . . . . 
H271 H 0.5294 0.3233 0.2212 0.0726 1.0000 Uiso R . . . . . 
H272 H 0.5352 0.1422 0.2097 0.0726 1.0000 Uiso R . . . . . 
H291 H 0.0957 0.3250 -0.0291 0.1343 1.0000 Uiso R . . . . . 
H293 H 0.1178 0.5033 -0.0510 0.1348 1.0000 Uiso R . . . . . 
H292 H 0.0820 0.4549 0.0424 0.1352 1.0000 Uiso R . . . . . 
H302 H 0.4444 0.5604 0.1109 0.1403 1.0000 Uiso R . . . . . 
H301 H 0.3235 0.6518 0.0396 0.1381 1.0000 Uiso R . . . . . 
H303 H 0.2882 0.5909 0.1303 0.1395 1.0000 Uiso R . . . . . 
H312 H 0.4725 0.3748 -0.0101 0.0856 1.0000 Uiso R . . . . . 
H313 H 0.3591 0.4607 -0.0819 0.0876 1.0000 Uiso R . . . . . 
H311 H 0.3471 0.2764 -0.0637 0.0867 1.0000 Uiso R . . . . . 
H251 H -0.113(3) 0.720(3) 0.3955(18) 0.0943 1.0000 Uiso D . . . . . 
loop_
_atom_site_aniso_label
_atom_site_aniso_U_11
_atom_site_aniso_U_22
_atom_site_aniso_U_33
_atom_site_aniso_U_23
_atom_site_aniso_U_13
_atom_site_aniso_U_12
Si1 0.01901(14) 0.0348(2) 0.02496(15) -0.00725(14) 0.00464(11) -0.00320(13) 
O2 0.0293(4) 0.0279(5) 0.0246(4) 0.0015(4) 0.0094(3) 0.0029(4) 
C3 0.0210(5) 0.0228(7) 0.0231(5) -0.0011(4) 0.0063(4) -0.0009(4) 
C4 0.0237(6) 0.0198(6) 0.0279(6) -0.0022(5) 0.0044(4) -0.0027(5) 
O5 0.0381(5) 0.0232(5) 0.0309(5) 0.0056(4) 0.0109(4) 0.0049(4) 
C6 0.0487(9) 0.0267(7) 0.0388(8) 0.0093(6) 0.0095(6) 0.0060(6) 
O7 0.0337(5) 0.0285(5) 0.0377(5) 0.0007(4) 0.0094(4) 0.0085(4) 
C8 0.0229(6) 0.0256(7) 0.0330(6) -0.0044(5) 0.0043(5) -0.0047(5) 
C9 0.0194(6) 0.0344(8) 0.0335(6) -0.0029(5) 0.0007(5) -0.0018(5) 
C10 0.0170(5) 0.0306(7) 0.0306(6) 0.0013(5) 0.0036(4) 0.0006(5) 
O11 0.0175(4) 0.0319(5) 0.0301(4) -0.0005(4) 0.0066(3) 0.0007(3) 
C12 0.0186(5) 0.0212(6) 0.0265(6) 0.0002(4) 0.0061(4) -0.0001(4) 
C13 0.0186(5) 0.0177(6) 0.0234(5) 0.0011(4) 0.0038(4) 0.0001(4) 
O14 0.0175(4) 0.0239(4) 0.0287(4) 0.0051(4) 0.0050(3) 0.0015(3) 
C15 0.0199(5) 0.0206(6) 0.0245(5) -0.0020(4) 0.0057(4) -0.0008(4) 
O16 0.0210(4) 0.0204(5) 0.0438(5) 0.0014(4) 0.0058(4) -0.0033(3) 
C17 0.0253(6) 0.0278(8) 0.0701(11) 0.0013(7) 0.0073(7) -0.0083(6) 
O18 0.0210(4) 0.0241(5) 0.0400(5) -0.0033(4) 0.0014(4) 0.0017(3) 
C19 0.0254(6) 0.0244(6) 0.0271(6) -0.0011(5) 0.0093(4) -0.0020(5) 
O20 0.0273(4) 0.0332(5) 0.0281(4) -0.0069(4) 0.0023(3) 0.0008(4) 
C21 0.0356(7) 0.0321(8) 0.0299(6) -0.0060(6) -0.0002(5) -0.0046(6) 
O22 0.0356(5) 0.0417(7) 0.0489(6) -0.0187(5) 0.0050(4) 0.0103(5) 
C23 0.0247(6) 0.0366(8) 0.0430(7) 0.0052(6) 0.0017(5) 0.0088(6) 
C24 0.0380(8) 0.0301(9) 0.0690(11) 0.0020(7) 0.0017(7) 0.0113(6) 
O25 0.0652(9) 0.0555(9) 0.0659(9) -0.0145(7) 0.0039(7) 0.0311(7) 
C26 0.0446(8) 0.0495(10) 0.0572(10) -0.0278(9) 0.0146(7) -0.0085(8) 
C27 0.0227(6) 0.0830(13) 0.0358(7) -0.0090(9) 0.0046(5) -0.0033(8) 
C28 0.0530(10) 0.0637(12) 0.0325(7) 0.0099(8) 0.0181(7) 0.0044(9) 
C29 0.0607(13) 0.165(3) 0.0515(11) 0.0514(16) 0.0236(10) 0.0477(16) 
C30 0.173(3) 0.0459(13) 0.0739(15) 0.0100(12) 0.0599(18) -0.0127(17) 
C31 0.0484(10) 0.0965(17) 0.0358(8) 0.0050(10) 0.0190(7) -0.0117(10) 

_refine_ls_extinction_method 
    'None'
_oxford_refine_ls_scale 9.40(19) 
loop_
 _geom_bond_atom_site_label_1
 _geom_bond_site_symmetry_1
 _geom_bond_atom_site_label_2
 _geom_bond_site_symmetry_2
 _geom_bond_distance
 _geom_bond_publ_flag
Si1 . O2 . 1.6422(9)    yes
Si1 . C26 . 1.8543(18)    yes
Si1 . C27 . 1.8606(14)    yes
Si1 . C28 . 1.8916(19)    yes
O2 . C3 . 1.3974(14)    yes
C3 . C4 . 1.5288(17)    yes
C3 . C8 . 1.5437(16)    yes
C3 . C13 . 1.5645(17)    yes
C4 . O5 . 1.3323(15)    yes
C4 . O7 . 1.1998(17)    yes
O5 . C6 . 1.4437(17)    yes
C6 . H61 . 0.963    no
C6 . H62 . 0.965    no
C6 . H63 . 0.974    no
C8 . C9 . 1.5285(19)    yes
C8 . H81 . 0.946    no
C8 . H82 . 0.961    no
C9 . C10 . 1.5184(19)    yes
C9 . H91 . 0.978    no
C9 . H92 . 0.963    no
C10 . O11 . 1.4440(15)    yes
C10 . O14 . 1.4215(14)    yes
C10 . C23 . 1.5138(19)    yes
O11 . C12 . 1.4235(14)    yes
C12 . C13 . 1.5605(15)    yes
C12 . C19 . 1.5213(17)    yes
C12 . H121 . 0.983    no
C13 . O14 . 1.4239(14)    yes
C13 . C15 . 1.5280(16)    yes
C15 . O16 . 1.3238(16)    yes
C15 . O18 . 1.1996(15)    yes
O16 . C17 . 1.4503(16)    yes
C17 . H171 . 0.957    no
C17 . H172 . 0.963    no
C17 . H173 . 0.963    no
C19 . O20 . 1.3191(15)    yes
C19 . O22 . 1.1993(17)    yes
O20 . C21 . 1.4453(16)    yes
C21 . H211 . 0.954    no
C21 . H212 . 0.958    no
C21 . H213 . 0.926    no
C23 . C24 . 1.507(2)    yes
C23 . H231 . 0.985    no
C23 . H232 . 0.970    no
C24 . O25 . 1.424(3)    yes
C24 . H241 . 0.996    no
C24 . H242 . 0.987    no
O25 . H251 . 0.860(17)    no
C26 . H262 . 0.960    no
C26 . H263 . 0.950    no
C26 . H261 . 0.939    no
C27 . H273 . 0.973    no
C27 . H271 . 0.946    no
C27 . H272 . 0.986    no
C28 . C29 . 1.527(3)    yes
C28 . C30 . 1.538(4)    yes
C28 . C31 . 1.531(2)    yes
C29 . H291 . 0.980    no
C29 . H293 . 0.954    no
C29 . H292 . 0.956    no
C30 . H302 . 0.983    no
C30 . H301 . 0.968    no
C30 . H303 . 0.966    no
C31 . H312 . 0.965    no
C31 . H313 . 0.968    no
C31 . H311 . 0.970    no
loop_
 _geom_angle_atom_site_label_1
 _geom_angle_site_symmetry_1
 _geom_angle_atom_site_label_2
 _geom_angle_site_symmetry_2
 _geom_angle_atom_site_label_3
 _geom_angle_site_symmetry_3
 _geom_angle
 _geom_angle_publ_flag
O2 . Si1 . C26 . 112.07(7)    yes
O2 . Si1 . C27 . 113.40(6)    yes
C26 . Si1 . C27 . 111.12(10)    yes
O2 . Si1 . C28 . 100.60(7)    yes
C26 . Si1 . C28 . 110.73(10)    yes
C27 . Si1 . C28 . 108.40(9)    yes
Si1 . O2 . C3 . 143.63(8)    yes
O2 . C3 . C4 . 111.19(10)    yes
O2 . C3 . C8 . 109.85(10)    yes
C4 . C3 . C8 . 107.50(10)    yes
O2 . C3 . C13 . 104.17(9)    yes
C4 . C3 . C13 . 115.33(10)    yes
C8 . C3 . C13 . 108.73(9)    yes
C3 . C4 . O5 . 111.52(10)    yes
C3 . C4 . O7 . 123.36(11)    yes
O5 . C4 . O7 . 124.87(12)    yes
C4 . O5 . C6 . 116.59(11)    yes
O5 . C6 . H61 . 108.1    no
O5 . C6 . H62 . 109.9    no
H61 . C6 . H62 . 111.3    no
O5 . C6 . H63 . 106.9    no
H61 . C6 . H63 . 110.9    no
H62 . C6 . H63 . 109.5    no
C3 . C8 . C9 . 111.10(11)    yes
C3 . C8 . H81 . 108.1    no
C9 . C8 . H81 . 110.8    no
C3 . C8 . H82 . 108.1    no
C9 . C8 . H82 . 109.1    no
H81 . C8 . H82 . 109.6    no
C8 . C9 . C10 . 110.40(10)    yes
C8 . C9 . H91 . 108.6    no
C10 . C9 . H91 . 109.5    no
C8 . C9 . H92 . 110.1    no
C10 . C9 . H92 . 109.9    no
H91 . C9 . H92 . 108.2    no
C9 . C10 . O11 . 109.52(11)    yes
C9 . C10 . O14 . 109.63(10)    yes
O11 . C10 . O14 . 104.00(9)    yes
C9 . C10 . C23 . 113.27(11)    yes
O11 . C10 . C23 . 110.84(11)    yes
O14 . C10 . C23 . 109.16(11)    yes
C10 . O11 . C12 . 108.22(9)    yes
O11 . C12 . C13 . 103.17(9)    yes
O11 . C12 . C19 . 109.00(10)    yes
C13 . C12 . C19 . 115.11(10)    yes
O11 . C12 . H121 . 111.9    no
C13 . C12 . H121 . 110.2    no
C19 . C12 . H121 . 107.5    no
C12 . C13 . C3 . 113.53(10)    yes
C12 . C13 . O14 . 100.48(9)    yes
C3 . C13 . O14 . 107.49(9)    yes
C12 . C13 . C15 . 116.47(10)    yes
C3 . C13 . C15 . 108.38(9)    yes
O14 . C13 . C15 . 109.90(9)    yes
C13 . O14 . C10 . 103.75(9)    yes
C13 . C15 . O16 . 112.06(10)    yes
C13 . C15 . O18 . 122.28(11)    yes
O16 . C15 . O18 . 125.65(11)    yes
C15 . O16 . C17 . 115.91(11)    yes
O16 . C17 . H171 . 106.7    no
O16 . C17 . H172 . 109.1    no
H171 . C17 . H172 . 111.2    no
O16 . C17 . H173 . 110.8    no
H171 . C17 . H173 . 109.9    no
H172 . C17 . H173 . 109.2    no
C12 . C19 . O20 . 111.16(10)    yes
C12 . C19 . O22 . 123.97(12)    yes
O20 . C19 . O22 . 124.83(12)    yes
C19 . O20 . C21 . 116.48(10)    yes
O20 . C21 . H211 . 109.1    no
O20 . C21 . H212 . 108.5    no
H211 . C21 . H212 . 107.8    no
O20 . C21 . H213 . 112.6    no
H211 . C21 . H213 . 109.2    no
H212 . C21 . H213 . 109.6    no
C10 . C23 . C24 . 115.54(12)    yes
C10 . C23 . H231 . 109.6    no
C24 . C23 . H231 . 107.8    no
C10 . C23 . H232 . 106.6    no
C24 . C23 . H232 . 108.1    no
H231 . C23 . H232 . 109.1    no
C23 . C24 . O25 . 113.07(15)    yes
C23 . C24 . H241 . 105.4    no
O25 . C24 . H241 . 104.7    no
C23 . C24 . H242 . 110.7    no
O25 . C24 . H242 . 114.1    no
H241 . C24 . H242 . 108.3    no
C24 . O25 . H251 . 101(2)    no
Si1 . C26 . H262 . 109.8    no
Si1 . C26 . H263 . 114.7    no
H262 . C26 . H263 . 109.7    no
Si1 . C26 . H261 . 109.7    no
H262 . C26 . H261 . 108.9    no
H263 . C26 . H261 . 103.9    no
Si1 . C27 . H273 . 111.4    no
Si1 . C27 . H271 . 109.3    no
H273 . C27 . H271 . 108.9    no
Si1 . C27 . H272 . 112.6    no
H273 . C27 . H272 . 107.5    no
H271 . C27 . H272 . 107.1    no
Si1 . C28 . C29 . 109.92(15)    yes
Si1 . C28 . C30 . 109.29(13)    yes
C29 . C28 . C30 . 109.8(2)    yes
Si1 . C28 . C31 . 110.76(15)    yes
C29 . C28 . C31 . 108.27(15)    yes
C30 . C28 . C31 . 108.82(19)    yes
C28 . C29 . H291 . 110.3    no
C28 . C29 . H293 . 111.0    no
H291 . C29 . H293 . 109.2    no
C28 . C29 . H292 . 107.9    no
H291 . C29 . H292 . 108.2    no
H293 . C29 . H292 . 110.2    no
C28 . C30 . H302 . 109.9    no
C28 . C30 . H301 . 108.5    no
H302 . C30 . H301 . 112.4    no
C28 . C30 . H303 . 108.3    no
H302 . C30 . H303 . 110.2    no
H301 . C30 . H303 . 107.3    no
C28 . C31 . H312 . 107.9    no
C28 . C31 . H313 . 111.2    no
H312 . C31 . H313 . 108.0    no
C28 . C31 . H311 . 110.7    no
H312 . C31 . H311 . 107.5    no
H313 . C31 . H311 . 111.4    no
loop_
 _geom_hbond_atom_site_label_D
 _geom_hbond_site_symmetry_D
 _geom_hbond_atom_site_label_H
 _geom_hbond_site_symmetry_H
 _geom_hbond_atom_site_label_A
 _geom_hbond_site_symmetry_A
 _geom_hbond_angle_DHA
 _geom_hbond_distance_DH
 _geom_hbond_distance_HA
 _geom_hbond_distance_DA
 _geom_hbond_publ_flag
C12 . H121 . O5 . 128.80 0.983 2.235 2.952(2)    yes
C12 . H121 . O22 2_546 139.56(4) 0.983 2.428 3.239(2)    yes
C21 . H211 . O7 2_656 164.88(4) 0.954 2.583 3.514(2)    yes
O25 . H251 . O11 . 134(3) 0.860 2.278 2.945(2)    yes
O25 . H251 . O22 . 148(3) 0.860 2.113 2.880(2)    yes


_iucr_refine_instructions_details
;
#
# Punched on 12/04/17 at 16:28:11
#
#LIST     12                                                                    
BLOCK 
CONT SCALE 
CONT SI   (    1 ,X'S,U'S)  UNTIL C    (   31 ) 
CONT H    (  251 ,X'S) 
CONT ENANTIO 
RIDE C   (   6,X'S) H   (  61,X'S) H   (  62,X'S) H   (  63,X'S) 
RIDE C   (   8,X'S) H   (  81,X'S) H   (  82,X'S) 
RIDE C   (   9,X'S) H   (  91,X'S) H   (  92,X'S) 
RIDE C   (  12,X'S) H   ( 121,X'S) 
RIDE C   (  17,X'S) H   ( 171,X'S) H   ( 172,X'S) H   ( 173,X'S) 
RIDE C   (  21,X'S) H   ( 211,X'S) H   ( 212,X'S) H   ( 213,X'S) 
RIDE C   (  23,X'S) H   ( 231,X'S) H   ( 232,X'S) 
RIDE C   (  24,X'S) H   ( 241,X'S) H   ( 242,X'S) 
RIDE C   (  26,X'S) H   ( 262,X'S) H   ( 263,X'S) H   ( 261,X'S) 
RIDE C   (  27,X'S) H   ( 273,X'S) H   ( 271,X'S) H   ( 272,X'S) 
RIDE C   (  29,X'S) H   ( 291,X'S) H   ( 293,X'S) H   ( 292,X'S) 
RIDE C   (  30,X'S) H   ( 302,X'S) H   ( 301,X'S) H   ( 303,X'S) 
RIDE C   (  31,X'S) H   ( 312,X'S) H   ( 313,X'S) H   ( 311,X'S) 
END                                                                             
#
# Punched on 12/04/17 at 16:28:11
#
#LIST     16                                                                    
NO 
REM   HREST   START (DO NOT REMOVE THIS LINE) 
REM NO H   NO #H U MULT DIST 
REM C-H 
REM >4           1.5    .96 DISORDER 
REM 1      1     1.2    .93 C C-H (ACETYLENE) 
REM 1      2     1.2    .93 C-C(H)-C 
REM 1      3     1.2    .98 (C)3-C-H 
REM 2      1     1.2    .93 C=C-H(2) 
REM 2      2     1.2    .97 (C)2-C-(H)2 
REM 3      1     1.5    .96 C-C-(H)3 
REM N-H 
REM >4           1.5    .89 DISORDER 
REM 1      1     1.2    .86 N-N/H 
REM 1      2     1.2    .86 (C)2-N-H 
REM 1      3     1.2    .89 (C)3-N-H 
REM 2      1     1.2    .86 C-N-(H)2 
REM 2      2     1.2    .89 (C)2-N-(H)2 
REM 3      1     1.2    .89 C-H-(H)3 
REM O-H 
REM 1      1     1.5    .82 O-H 
REM 
REM DIST      ESD = 0.02 
REM VIB       ESD = 0.002 
REM ANGLE     ESD = 2.0 
REM       H ON O-HETRO ATOM 
DIST 0.82, 0.02 = 
CONT O ( 25) TO H(251) 
REST 0.095, 0.002 = H(251,U[ISO]) 
REM   HREST   END (DO NOT REMOVE THIS LINE) 
END                                                                             
;
